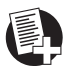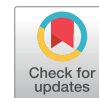

# Sulfonylureas and the Risks of Cardiovascular Events and Death: A Methodological Meta-Regression Analysis of the Observational Studies

Laurent Azoulay<sup>1,2,3</sup> and Samy Suissa<sup>1,2</sup>

*Diabetes Care* 2017;40:706–714 | DOI: 10.2337/dc16-1943

Recent randomized trials have compared the newer antidiabetic agents to treatments involving sulfonylureas, drugs associated with increased cardiovascular risks and mortality in some observational studies with conflicting results. We reviewed the methodology of these observational studies by searching MEDLINE from inception to December 2015 for all studies of the association between sulfonylureas and cardiovascular events or mortality. Each study was appraised with respect to the comparator, the outcome, and study design–related sources of bias. A meta-regression analysis was used to evaluate heterogeneity. A total of 19 studies were identified, of which six had no major design-related biases. Sulfonylureas were associated with an increased risk of cardiovascular events and mortality in five of these studies (relative risks 1.16–1.55). Overall, the 19 studies resulted in 36 relative risks as some studies assessed multiple outcomes or comparators. Of the 36 analyses, metformin was the comparator in 27 (75%) and death was the outcome in 24 (67%). The relative risk was higher by 13% when the comparator was metformin, by 20% when death was the outcome, and by 7% when the studies had design-related biases. The lowest predicted relative risk was for studies with no major bias, comparator other than metformin, and cardiovascular outcome (1.06 [95% CI 0.92–1.23]), whereas the highest was for studies with bias, metformin comparator, and mortality outcome (1.53 [95% CI 1.43–1.65]). In summary, sulfonylureas were associated with an increased risk of cardiovascular events and mortality in the majority of studies with no major design-related biases. Among studies with important biases, the association varied significantly with respect to the comparator, the outcome, and the type of bias. With the introduction of new antidiabetic drugs, the use of appropriate design and analytical tools will provide their more accurate cardiovascular safety assessment in the real-world setting.

It is well established that type 2 diabetes is associated with an increased risk of cardiovascular morbidity and mortality (1). Although much of this association can be attributed to the long-term complications of this disease, there has been growing interest in determining whether certain antidiabetic drugs influence this risk. In particular, over the years, there have been concerns regarding the cardiovascular safety of sulfonylureas, the second most commonly used antidiabetic drugs after metformin. These safety concerns initiated with the University Group Diabetes Program (UGDP) conducted in the 1960s, where tolbutamide (a first-generation sulfonylurea) was

<sup>1</sup>Center for Clinical Epidemiology, Lady Davis Institute, Jewish General Hospital, Montreal, Canada

<sup>2</sup>Department of Epidemiology, Biostatistics, and Occupational Health, McGill University, Montreal, Canada

<sup>3</sup>Gerald Bronfman Department of Oncology, McGill University, Montreal, Canada

Corresponding author: Laurent Azoulay, laurent.azoulay@mcgill.ca.

Received 8 September 2016 and accepted 7 January 2017.

© 2017 by the American Diabetes Association. Readers may use this article as long as the work is properly cited, the use is educational and not for profit, and the work is not altered. More information is available at <http://www.diabetesjournals.org/content/license>.

See accompanying article, p. 629.

associated with an increased risk of all-cause and cardiovascular mortality compared with placebo (2). Indeed, sulfonylureas have been associated with weight gain, fluid retention, and hypoglycemia, which are all known cardiovascular risk factors (3). In contrast, meta-analyses of sulfonylurea randomized controlled trials (RCTs) have produced conflicting findings with respect to cardiovascular events and mortality (4–6). However, none of these RCTs were designed or powered to detect cardiovascular events and the RCTs used different comparators, including other oral agents or placebo.

In contrast to the RCTs, several observational studies have associated sulfonylureas with an increased risk of cardiovascular events and death (7). However, these observational studies used varying approaches to study design and data analysis that could have introduced several biases. With the introduction of new antidiabetic drugs, such as dipeptidyl peptidase-4 (DPP-4) inhibitors, glucagon-like peptide 1 (GLP-1) analogs, and sodium-glucose cotransporter 2 (SGLT2) inhibitors, drugs that will likely undergo the same scrutiny as sulfonylureas, there is a need to understand how bias can be introduced (and avoided) in observational studies assessing the safety of second- to third-line treatments. Moreover, many RCTs of the newer drugs have included and will include sulfonylureas in the comparator group.

The objective of this methodological review is to detail the most important methodological limitations of observational studies assessing the cardiovascular safety of sulfonylureas and identify the most robust observational studies of the association between sulfonylureas and the risk of cardiovascular events. This review will thus provide guidance for future studies on the use of robust methods to minimize bias in assessing the cardiovascular safety of newer antidiabetic drugs.

## RESEARCH DESIGN AND METHODS

### Search Strategy

A MEDLINE search was conducted to identify all observational studies assessing the effects of sulfonylureas on the incidence of cardiovascular and cerebrovascular events, cardiovascular mortality, and all-cause mortality. The search terms included “sulfonylureas,” “cardiovascular,” “myocardial infarction,” “coronary artery disease,” “stroke,” and “mortality.” The

search was limited to studies published in English before 31 December 2015.

### Inclusion Criteria

To be included in this methodological review, the observational studies had to have 1) compared at least one sulfonylurea (alone or in combination with other antidiabetic drugs) with specific antidiabetic drugs or no use of sulfonylureas and 2) reported on at least one of the outcomes of interest (cardiovascular events, cerebrovascular events, and cardiovascular-specific and all-cause mortality). Studies comparing different sulfonylureas to each other or to patients without diabetes were not included, as were those conducted within selected cardiovascular populations, such as among those previously hospitalized for myocardial infarction. The latter represent distinct populations that assessed the effects of sulfonylureas on the risk of recurrent events. Such studies have their own set of methodological challenges, which are outside the scope of this review.

### Sources of Bias

One of the major threats to observational studies is confounding bias, which presents important challenges in their conduct. Indeed, any study evaluating the risk of sulfonylureas will have to ensure that the comparator group of patients is practically identical to the patients using sulfonylureas. Thus, in contrast with RCTs where such comparability is inherently established by randomization, observational studies must rely on matching or statistical adjustment techniques to minimize the potential for confounding bias and determine comparability. Although most observational studies accomplish this quite well within the limitations of the available data, there are other sources of bias that can arise in their study design, which can have a greater impact on their results. In this article, we focus mainly on some of these study design limitations that could lead to bias other than from confounding, namely exposure misclassification, time-lag bias, and selection bias. In addition, we discuss the role of the comparator used in these studies.

### Data Analysis

A meta-regression analysis was used to evaluate the heterogeneity among the relative risks. A multivariate log-linear regression model was used to fit the relative

risks as a function of the three study design factors, namely the presence of major bias, the comparator being metformin or other, and the outcome being mortality versus cardiovascular events. The model was weighted by the inverse of the variance of the logarithm of each relative risk. This analysis estimated the ratio of relative risks (RRR) associated independently with each of the three factors, along with the 95% CIs. From this model, we also estimated the lowest and highest predicted relative risks (PRRs) and their 95% CIs on the basis of the three study design factors.

## RESULTS

As of 31 December 2015, we identified a total of 44 observational studies that assessed the cardiovascular safety of sulfonylureas (8–51). Of those, 15 studies assessed outcomes within selected populations with cardiovascular complications (8,15,16,23,24,27,30–33,35,40,41,44,49), 6 studies performed within-class comparisons (9,19,28,34,39,47), and 4 studies used patients without type 2 diabetes as comparators (10,18,50,51). The remaining 19 studies were conducted within unselected populations (11–14,17,20–22,25,26,29,36–38,42,43,45,46,48). These 19 studies were assessed independently by the two authors for their study design quality.

The aforementioned studies were classified into one of four categories: exposure misclassification (17,36,42), time-lag bias (12,13,20,25,26,37,42,45,48), selection bias (14,22), and studies with no major biases (11,21,29,38,43,46). Overall, the relative risks ranged between 1.37 and 1.70 in studies with exposure misclassification, between 0.95 and 2.08 in studies with time-lag bias, between 1.23 and 1.24 in studies with selection bias, and between 0.95 and 1.55 in studies with no major biases. These studies are listed in Tables 1 and 2, and their biases are described in detail below along with some illustrative examples.

### Exposure Misclassification

Exposure misclassification is invariably a limitation of all observational studies. However, in many studies investigating the association between the use of sulfonylureas and cardiovascular outcomes, this exposure misclassification was magnified by using intent-to-treat (ITT) analyses (17,36,42). Just as with

**Table 1—Methodological limitations of observational studies investigating the effects of sulfonylureas alone or in combination with other antidiabetic drugs on the incidence of cardiovascular events or mortality**

| Author                            | Study design        | Comparison                                            | Outcome(s)                                    | Relative risk <sup>a</sup> (95% CI)                            |
|-----------------------------------|---------------------|-------------------------------------------------------|-----------------------------------------------|----------------------------------------------------------------|
| <b>Exposure misclassification</b> |                     |                                                       |                                               |                                                                |
| Evans et al. (17)                 | Cohort              | Sulfonylureas vs. metformin                           | All-cause mortality                           | 1.43 (1.15–1.77)                                               |
|                                   |                     | Sulfonylureas vs. metformin                           | Cardiovascular mortality                      | 1.70 (1.18–2.45)                                               |
| Corrao et al. (36)                | Cohort              | Sulfonylureas vs. metformin                           | All-cause mortality                           | 1.37 (1.26–1.49)                                               |
| Pantalone et al. (42)             | Cohort              | Glipizide vs. metformin                               | All-cause mortality                           | 1.64 (1.39–1.94)                                               |
|                                   |                     | Glyburide vs. metformin                               | All-cause mortality                           | 1.59 (1.35–1.88)                                               |
|                                   |                     | Glimepiride vs. metformin                             | All-cause mortality                           | 1.68 (1.37–2.06)                                               |
| <b>Time-lag bias</b>              |                     |                                                       |                                               |                                                                |
| Mannucci et al. (12)              | Cohort              | Sulfonylurea + metformin vs. other antidiabetic drugs | All-cause mortality                           | 2.08 (1.18–3.67) <sup>b</sup><br>1.68 (1.01–2.79) <sup>c</sup> |
| Koro et al. (13)                  | Nested case-control | Sulfonylureas vs. no treatment                        | CHF                                           | 1.19 (1.02–1.39)                                               |
| Kahler et al. (20)                | Cohort              | Sulfonylureas vs. metformin                           | All-cause mortality                           | 1.15 (0.91–1.47) <sup>d</sup>                                  |
|                                   |                     | Sulfonylureas vs. TZD                                 | All-cause mortality                           | 1.04 (0.75–1.46) <sup>d</sup>                                  |
| Tzoulaki et al. (25)              | Cohort              | Sulfonylureas vs. metformin                           | All-cause mortality                           | 1.37 (1.11–1.71) <sup>e</sup>                                  |
|                                   |                     | Sulfonylureas vs. metformin                           | All-cause mortality                           | 1.24 (1.14–1.35) <sup>f</sup>                                  |
| Pantalone et al. (26)             | Cohort              | Sulfonylureas vs. metformin                           | CHF                                           | 1.32 (1.10–1.56) <sup>d</sup>                                  |
|                                   |                     | Sulfonylureas vs. metformin                           | All-cause mortality                           | 1.85 (1.56–2.17) <sup>d</sup>                                  |
|                                   |                     | Sulfonylureas vs. pioglitazone                        | All-cause mortality                           | 1.69 (1.23–2.33) <sup>d</sup>                                  |
| Horsdal et al. (37)               | Case-control        | Sulfonylureas vs. metformin                           | Myocardial infarction                         | 1.16 (1.05–1.28) <sup>d</sup>                                  |
|                                   |                     | Sulfonylureas vs. insulin                             | Myocardial infarction                         | 1.09 (1.01–1.16) <sup>d</sup>                                  |
| Pantalone et al. (42)             | Cohort              | Glipizide vs. metformin                               | All-cause mortality                           | 1.64 (1.39–1.94)                                               |
|                                   |                     | Glyburide vs. metformin                               | All-cause mortality                           | 1.59 (1.35–1.88)                                               |
|                                   |                     | Glimepiride vs. metformin                             | All-cause mortality                           | 1.68 (1.37–2.06)                                               |
| Currie et al. (45)                | Cohort              | Sulfonylureas vs. metformin                           | All-cause mortality                           | 1.75 (1.64–1.86)                                               |
| Ghotbi et al. (48)                | Cohort              | Sulfonylureas vs. insulin                             | MACE <sup>g</sup>                             | 0.95 (0.73–1.22)                                               |
|                                   |                     | Sulfonylureas vs. insulin                             | All-cause mortality                           | 1.20 (0.90–1.60)                                               |
| <b>Selection bias</b>             |                     |                                                       |                                               |                                                                |
| Johnson et al. (14)               | Cohort              | Sulfonylureas vs. metformin                           | Nonfatal hospitalization, all-cause mortality | 1.23 (1.03–1.47) <sup>d</sup>                                  |
| McAlister et al. (22)             | Cohort              | Sulfonylureas vs. metformin                           | CHF                                           | 1.24 (1.01–1.54)                                               |

MACE, major adverse cardiovascular event; TZD, thiazolidinedione. <sup>a</sup>Relative risk is used as a generic term for rate ratio, HR, and odds ratio.

<sup>b</sup>Estimated among women. <sup>c</sup>Estimated among men. <sup>d</sup>For consistency with the rest of the table, the relative risks and 95% CIs were inverted when sulfonylureas were the comparator group. <sup>e</sup>Analysis based on first-generation sulfonylureas. <sup>f</sup>Analysis based on second-generation sulfonylureas.

<sup>g</sup>Included nonfatal myocardial infarction, nonfatal stroke, resuscitation after cardiac arrest, or cardiovascular death.

RCTs, the ITT approach assumes patients remain on the initial treatment throughout the follow-up period, regardless of treatment discontinuation and, in some cases, also regardless of treatment intensification or switching. Unlike in RCTs, however, this approach will not ensure that potential confounders are well balanced between the exposure groups, thus necessitating advanced study design and statistical methods to control for confounding. The appeal of using this approach within an observational setting is its simplicity of implementation, while minimizing potential biases related to censoring patients at the time of treatment discontinuation, particularly if the latter is related to the outcome of interest.

An example of this approach is one study using databases from the Italian region of Lombardy (36). In this well-

conducted study, the authors identified a cohort of 70,437 patients who initiated metformin or a sulfonylurea in monotherapy between 2001 and 2003. Patients were followed from the date of the first prescription until the first hospitalization for macrovascular disease, death, emigration, or end of the study period (31 July 2007). Thus, patients were considered exposed to their initial treatment, either metformin or sulfonylureas, for up to 7 years after their first prescription, regardless of treatment termination or switch to another antidiabetic drug during this period. Overall, compared with metformin, the use of sulfonylureas was associated with an increased risk of hospitalization (hazard ratio [HR] 1.15 [95% CI 1.08–1.21]) and death from any cause (HR 1.37 [95% CI 1.26–1.49]). The ITT approach generally, and particularly in RCTs, leads to a nondifferential

misclassification of exposure that results in biasing the risk estimates toward a null effect. However, there are certain situations, particularly in observational studies, where the opposite can occur. In the present example, the authors provided a useful analysis showing that sulfonylurea users were more likely to have switched to insulin during the follow-up period than metformin users (HR 1.55 [95% CI 1.43–1.68]). This may be related to the fact that sulfonylureas have a lower efficacy in lowering HbA<sub>1c</sub> than metformin (52). It may also be related to the fact that sulfonylurea users had advanced disease when they initiated treatment and were thus more likely to progress to using the last-line treatment (i.e., insulin) than metformin users. As diabetes severity is likely associated with an increased risk of cardiovascular events, the ITT approach in this study

**Table 2—Observational studies with no major biases assessing the cardiovascular safety of sulfonylureas**

| Author                       | Study design        | Comparison                              | Outcome(s)                        | Relative risk <sup>a</sup> (95% CI) |
|------------------------------|---------------------|-----------------------------------------|-----------------------------------|-------------------------------------|
| <b>Cardiovascular events</b> |                     |                                         |                                   |                                     |
| McAfee et al. (21)           | Cohort              | Sulfonylureas vs. metformin             | MI and coronary revascularization | 1.30 (1.04–1.61)                    |
| Schramm et al. (38)          | Cohort              | Glimepiride vs. metformin               | MACE                              | 1.32 (1.24–1.40)                    |
|                              |                     | Glyburide vs. metformin                 | MACE                              | 1.19 (1.11–1.28)                    |
|                              |                     | Glipizide vs. metformin                 | MACE                              | 1.27 (1.17–1.38)                    |
|                              |                     | Tolbutamide vs. metformin               | MACE                              | 1.28 (1.17–1.39)                    |
| Roumie et al. (43)           | Cohort              | Sulfonylureas vs. metformin             | MACE                              | 1.16 (1.08–1.25)                    |
| <b>All-cause mortality</b>   |                     |                                         |                                   |                                     |
| Gulliford et al. (11)        | Cohort              | Sulfonylureas + metformin vs. metformin | All-cause mortality               | 0.95 (0.64–1.40)                    |
| Azoulay et al. (29)          | Nested case-control | Sulfonylureas vs. metformin             | All-cause mortality               | 1.43 (1.33–1.56)                    |
| Wheeler et al. (46)          | Cohort              | Glyburide vs. metformin                 | All-cause mortality               | 1.38 (1.27–1.50)                    |
|                              |                     | Glipizide vs. metformin                 | All-cause mortality               | 1.55 (1.43–1.67)                    |

MACE, major adverse cardiovascular event; MI, myocardial infarction. <sup>a</sup>Relative risk is used as a generic term for rate ratio, HR, and odds ratio.

likely led to an overestimation of the association. This potential bias could have been minimized by limiting follow-up to a shorter time period (e.g., 1 year) and/or using an as-treated exposure definition that would have limited the follow-up to the time while on treatment, or using a corresponding time-dependent analysis.

### Time-Lag Bias

Time-lag bias arises when comparing treatments at different stages of the disease process (53). As duration of diabetes has been previously associated with cardiovascular outcomes (54), comparing drugs prescribed at different stages of the disease can introduce important bias (53). For example, in cohort studies, time-lag bias can be introduced when comparing a second- to third-line treatment (e.g., thiazolidinediones) to a first-line treatment (e.g., metformin). Such comparisons introduce confounding by disease severity that may be difficult to control for in the analysis (see Fig. 1 for a graphical representation of this bias). This bias can also be present in case-control studies if the duration of the disease is different between case and control subjects.

A number of observational studies investigating the cardiovascular effects of sulfonylureas were likely affected by time-lag bias (12,13,20,25,26,37,42,45,48). In one study using the U.K. General Practice Research Database (GPRD) (now known as the Clinical Practice Research Datalink [CPRD]), the authors conducted a nested case-control analysis to assess the association between different antidiabetic drugs and the risk of congestive heart failure (CHF) (13). The underlying cohort included 21,888 patients newly diagnosed with

type 2 diabetes, of which 1,301 were diagnosed with CHF during follow-up (case subjects). These case subjects were then matched to 7,788 control subjects who were never diagnosed with CHF during follow-up on age, sex, and calendar year of the CHF diagnosis. Overall, compared with sulfonylurea monotherapy, the combination of metformin with sulfonylureas was associated with an increased risk of CHF (odds ratio 1.38 [95% CI 1.13–1.69]). It is important to note that calendar time was the underlying time axis used to match case and control subjects, and not duration of disease. As such, this may result in a differential duration of disease between case and control subjects. In this particular example, it is possible that case subjects were more likely to be using a combination therapy if their duration of disease was on average longer than in their matched control subjects. Conversely, because of the random selection of control subjects, it is also possible for control subjects to have a longer duration of disease compared with case subjects. As a result, failure to match on disease duration can produce spurious results that can go in either direction (i.e., increased risk as observed in this study or decreased risk).

In another study using the U.K. GPRD, the authors conducted a large cohort study among 91,521 patients to assess the association between different antidiabetic drugs and the risk of myocardial infarction, CHF, and all-cause mortality (25). The unit of analysis was the time interval on which a patient was using a specific antidiabetic drug. For example, a patient starting treatment with metformin monotherapy and then switching to a sulfonylurea would

contribute two time intervals, one corresponding to metformin and another corresponding to sulfonylurea. As a result, the 91,521 patients included in the study generated 2,843,007 intervals of treatment with antidiabetic drugs. Using metformin monotherapy as the reference, the authors reported that monotherapy with sulfonylureas (either first or second generation) was associated with increased risks of all three outcomes. The methodology used in this study may hold well in settings where the time intervals are assumed to be interchangeable, i.e., where the risk of the outcome of interest is the same regardless of follow-up or disease duration. In the context of the progressive nature of type 2 diabetes, however, this assumption is unlikely to hold. As a result, comparing treatment intervals that are separated by several years may introduce time-lag bias, as it becomes difficult to separate the effects of the drug from the effects of the underlying disease progression. While one method for minimizing this potential bias can be to adjust the statistical models for duration of diabetes (as was done by the authors), the latter is at best a moderate proxy for diabetes severity. Alternatively, matching the treatment intervals on diabetes duration or defining exposure as a time-varying variable using duration of diabetes as the underlying time axis may be a more effective means of minimizing this source of confounding.

### Choice of the Comparator

The choice of the comparator group is another major consideration in observational studies assessing the safety of second- to third-line antidiabetic drugs, which can affect the risk estimates

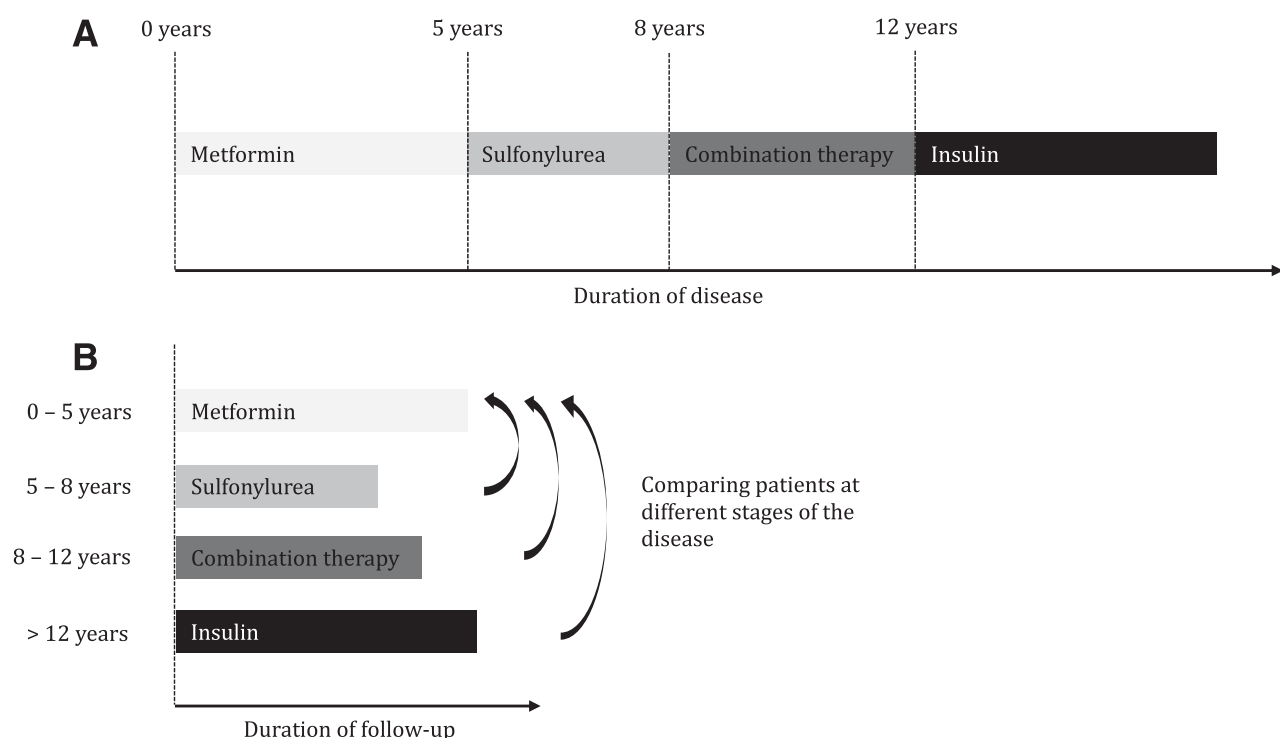

**Figure 1**—Time-lag bias introduced by comparing patients at different stages of the disease progression. A: Treatment trajectory of a hypothetical patient. B: Time-lag bias is introduced when comparing patients at different stages of the disease, in this case, the use of different antidiabetic drugs to metformin.

above and beyond the biases described above. For instance, using as comparator thiazolidinediones, which have been associated with an increased risk of cardiovascular events (55), could lead to an underestimation of the association. In contrast, another approach has been to compare the use of sulfonylureas with “no use,” a comparator group consisting of patients not currently using any antidiabetic drug (13). As this comparator group may include patients with less severe disease not requiring pharmacological treatment, comparing an antidiabetic drug to this comparator may lead to an overestimation of the association. Indeed, in one study assessing the association between different antidiabetic drugs and the risk of CHF, sulfonylurea monotherapy was associated with a 19% increased risk (HR 1.19 [95% CI 1.02–1.39]) when compared with no use (13). Interestingly, a similar HR was observed with metformin monotherapy (HR 1.20 [95% CI 0.97–1.48]), a drug thought to have neutral effects on cardiovascular risk (13). Finally, a common approach has been to compare a specific antidiabetic drug with “any use” of other antidiabetic drugs. The latter may include a mix of

patients using antidiabetic drugs in monotherapy, combination users, and insulin users. As such, this comparator group includes patients with different disease severities, rendering the findings difficult to interpret.

#### Selection Bias

Selection bias is an important threat to the validity of observational studies. Selection bias is a systematic error that occurs when the selection of patients into a study is influenced by their exposure and disease status. Some of the observational studies investigating the association between sulfonylureas and cardiovascular outcomes likely suffered from selection bias (14,22). For example, in one study using the Saskatchewan Health administrative databases, the authors conducted a cohort study among 5,702 patients to assess whether metformin monotherapy is associated with a lower risk of a composite end point of first nonfatal hospitalization for any cause or death, compared with sulfonylurea monotherapy (14). Overall, metformin monotherapy, compared with sulfonylureas, was associated with a decreased risk of the composite end point (HR 0.81 [95% CI 0.68–0.97]),

which corresponds by numerical inversion to an increased risk with sulfonylureas (HR 1.23 [95% CI 1.03–1.47]), compared with metformin. Although this study had several strengths, a number of exclusions may have affected the findings. Specifically, out of the 12,188 patients prescribed oral antidiabetic drugs during the study period (1991–1999), 6,486 (53.2%) patients were excluded on the basis of future events occurring during the follow-up period (such as a dispensation of insulin [ $n = 1,443$ ], <1 year of oral antidiabetic drug use [ $n = 2,009$ ], and receiving less than the recommended average daily dose during one or more 6-month intervals [ $n = 3,034$ ]). These exclusion criteria all involve immortal time, which implies that the patient necessarily had to be alive during part of the follow-up period to satisfy one of the criteria. For example, the 1,443 patients excluded because they received insulin some time during follow-up had to be alive at the time that they received the insulin; such exclusions will introduce immortal time bias (56). The magnitude of this bias will be particularly important if the time to insulin is longer in one group than the other, which we suspect to be the case



with metformin (longer time to starting insulin) and sulfonylureas (shorter time). Consequently, selection bias was likely introduced in an effort to create mutually exclusive groups of sulfonylurea and metformin monotherapy users during the entire follow-up period.

### Studies With No Major Biases

All observational studies are prone to some degree of bias. However, certain design and analytical choices could minimize these biases. To date, six observational studies did not suffer from the major biases discussed above (11,21,29,38,43,46). For example, in the study by Roumie et al. (43), the authors used the Veterans Health Administration databases to assess whether sulfonylurea monotherapy ( $n = 98,665$ ) was associated with an increased risk of a composite of acute myocardial infarction, stroke, or death, compared with metformin monotherapy ( $n = 155,025$ ). In addition to its large sample size, this study restricted the cohort to patients newly treated with these drugs (defined as no prescription in the year before), thereby minimizing time-lag bias (53). It also used an as-treated exposure definition that followed patients until a switch or an addition of another antidiabetic drug, an outcome, or one of the study's censoring events, an approach that minimized exposure misclassification. In addition, the study minimized the potential for confounding bias, with the use of propensity score matching of the patients on sulfonylurea monotherapy with those on metformin monotherapy. Overall, the use of sulfonylureas was associated with a modest increased risk of the composite end point (HR 1.16 [95% CI 1.08–1.25]).

### Meta-Regression Analysis

The results of the meta-regression log-linear model analysis are summarized in Table 3. Overall, the relative risk of an adverse event is higher by 13% when the comparator is metformin with an RRR of 1.13 (95% CI 1.01–1.27). Moreover, the relative risk is higher by 20% when death is the outcome (RRR 1.20 [95% CI 1.07–1.34]). Finally, for the studies with major bias as defined above, the relative risk was higher by 7% (RRR 1.07 [95% CI 0.95–1.20]). As a result of this model, the lowest PRR was for studies with no major bias, where the comparator was other than metformin and where the outcome was a nonfatal cardiovascular event (lowest PRR 1.06 [95% CI 0.92–1.23]). The

**Table 3—Crude and adjusted RRRs of adverse event associated with sulfonylurea use according to study design parameters from the meta-regression analysis of 36 estimates of relative risk from the observational studies listed in Tables 1 and 2**

|                            | Number of relative risk estimates | Mean relative risk | Crude RRR | Adjusted RRR* (95% CI) |
|----------------------------|-----------------------------------|--------------------|-----------|------------------------|
| Comparator                 |                                   |                    |           |                        |
| Metformin                  | 27                                | 1.43               | 1.08      | 1.13 (1.01–1.27)       |
| Other (reference)          | 9                                 | 1.32               | 1.00      | 1.00 (reference)       |
| Outcome                    |                                   |                    |           |                        |
| Death                      | 24                                | 1.50               | 1.24      | 1.20 (1.07–1.34)       |
| Cardiovascular (reference) | 12                                | 1.21               | 1.00      | 1.00 (reference)       |
| Major bias                 |                                   |                    |           |                        |
| Yes                        | 26                                | 1.44               | 1.13      | 1.07 (0.95–1.20)       |
| No (reference)             | 10                                | 1.28               | 1.00      | 1.00 (reference)       |

\*Adjusted for one another and weighted by the inverse of the variance.

highest PRR was for studies with major bias, where the comparator was metformin and where the outcome was mortality (highest PRR 1.53 [95% CI 1.43–1.65]).

### CONCLUSIONS

Assessing the cardiovascular safety of second- to third-line antidiabetic drugs can be challenging. As discussed above, certain design and analytical decisions can help circumvent some of these challenges and the biases that ensue. First, given the progressive nature of type 2 diabetes, the primary exposure definition should be based on an as-treated approach or modeling exposure as a time-varying variable. An ITT exposure could also be used to complement the aforementioned exposure definitions but will need to be limited to a relatively short follow-up period (e.g., 1 year) to avoid the exposure misclassification issues described above. Second, it is important to compare drugs used at a similar stage of the disease to avoid time-lag bias (53). For example, comparing a combination of metformin and sulfonylurea (a second- to third-line treatment strategy) to metformin monotherapy (a first-line treatment strategy) will introduce important confounding by indication that may be difficult to adjust for in the statistical models. The alternative would be to compare a combination therapy with another combination used at a similar stage of the disease, or alternatively match the combination users with monotherapy users on diabetes duration. Third, inclusion of patients in a study should not be based on future events occurring during the follow-up period (such as excluding patients eventually exposed to a specific antidiabetic drug); such inclusion criteria could lead

to important selection bias. Instead, such patients should be allowed to be included in the cohort, and other mechanisms such as censoring could be used to mitigate this issue (assuming the censoring is noninformative). Finally, rigorous adjustment of potential confounders is necessary; this can be achieved with the use of methods such as propensity scores or marginal structural models (57).

In addition to the methodological issues described above, it is important to recognize that there are differences in the pharmacodynamic and pharmacokinetic properties of the different sulfonylureas; these may have an impact on their association with cardiovascular outcomes (58). Indeed, some sulfonylureas are not selective for pancreatic  $\beta$ -cells and thus may increase the risk of cardiovascular outcomes by binding to receptors in other tissues, such as cardiomyocytes and vascular smooth muscle cells (59). As such, it will be necessary for future studies to assess the effects of sulfonylureas as a class, as well as the effects of each individual sulfonylurea.

Understanding the cardiovascular effects of sulfonylureas is also important because many RCTs of the newer antidiabetic drugs use sulfonylureas as the comparator drug or include them as part of the comparator regimen. Thus, the safety assessment of these newer drugs can inherently possibly conceal an increased cardiovascular risk if the comparator group includes a treatment that increases this risk. Likewise, it is possible that the benefits on cardiovascular and mortality outcomes observed in some of the recent trials may be due, at least in part, to the fact that a higher proportion of patients in the placebo

arms initiated sulfonylureas during the follow-up period (60–62). Thus, our present meta-regression analysis of the observational studies to data suggests that some caution be used in interpreting the data from such recent trials when sulfonylureas are involved in the comparator.

The cardiovascular safety of some of the newer antidiabetic agents, such as DPP-4 inhibitors, has also recently been the subject of some concern. In the Saxagliptin Assessment of Vascular Outcomes Recorded in Patients with Diabetes Mellitus–Thrombolysis in Myocardial Infarction (SAVOR-TIMI) 53 trial, patients randomized to saxagliptin had a higher risk of hospitalization for CHF compared with placebo (HR 1.27 [95% CI 1.07–1.51]) (63). In contrast, this association was not observed in the vast majority of the observational studies conducted to date (64–72), with the exception of two studies (73,74). Although the absence of an association in most of these studies provides some reassurance with respect to CHF, the assessment of other cardiovascular outcomes will require careful attention to design-related decisions. As the newer antidiabetic drugs are intended to be used as second- to third-line treatments, it will be imperative that they are compared with drugs used at a similar stage of the disease, and using the appropriate exposure definitions. Failure to consider these important design-related decisions will likely introduce bias and, in the process, generate more uncertainty on the safety of these drugs.

In summary, the majority of the studies reporting on the association between sulfonylureas and cardiovascular risk had design-related biases, such as exposure misclassification, time-lag bias, and selection bias. However, the majority of studies with no major design-related biases reported increased risks of cardiovascular events and mortality with sulfonylureas. Overall, the role of the comparator drug used had an important bearing on the risk estimates. Indeed, the lowest PRR was for studies with none of the major biases described above, where the comparator was not metformin, and where the event definition was based on a cardiovascular outcome. In contrast, the highest PRR was for studies with major biases, where metformin was the comparator, and where the outcome was mortality. This heterogeneity highlights the

need to use appropriate methodological approaches to minimize bias when assessing the safety of second- to third-line antidiabetic drugs. This is highly relevant in this era of new antidiabetic drugs (such as DPP-4 inhibitors, GLP-1 analogs, and SGLT2 inhibitors), where there will be a need to assess their cardiovascular safety in the real-world setting.

**Funding.** This research was funded in part by grants from the Canadian Institutes of Health Research and the Canadian Foundation for Innovation. L.A. is the recipient of a Chercheur-Boursier award from the Fonds de recherche du Québec - Santé. S.S. is the recipient of the James McGill Professorship award.

**Duality of Interest.** This research was funded in part by a grant from Boehringer Ingelheim. No other potential conflicts of interest relevant to this article were reported.

**Author Contributions.** L.A. drafted the manuscript. L.A. and S.S. conceived and designed the study, performed the statistical analyses, interpreted the data, and critically revised the manuscript for important intellectual content.

## References

- Huxley R, Barzi F, Woodward M. Excess risk of fatal coronary heart disease associated with diabetes in men and women: meta-analysis of 37 prospective cohort studies. *BMJ* 2006;332:73–78
- Meinert CL, Knatterud GL, Prout TE, Klimt CR. A study of the effects of hypoglycemic agents on vascular complications in patients with adult-onset diabetes. II. Mortality results. *Diabetes* 1970;19(Suppl.):789–830
- Tahrani AA, Barnett AH, Bailey CJ. Pharmacology and therapeutic implications of current drugs for type 2 diabetes mellitus. *Nat Rev Endocrinol* 2016;12:566–592
- Selvin E, Bolen S, Yeh HC, et al. Cardiovascular outcomes in trials of oral diabetes medications: a systematic review. *Arch Intern Med* 2008;168:2070–2080
- Varvaki Rados D, Catani Pinto L, Reck Remonti L, Bauermann Leitão C, Gross JL. The association between sulfonylurea use and all-cause and cardiovascular mortality: a meta-analysis with trial sequential analysis of randomized clinical trials. *PLoS Med* 2016;13:e1001992
- Bain S, Druyts E, Balijepalli C, et al. Cardiovascular events and all-cause mortality associated with sulfonylureas compared with other antihyperglycaemic drugs: a Bayesian meta-analysis of survival data. *Diabetes Obes Metab*. 14 November 2016 [Epub ahead of print]. DOI: 10.1111/dom.12821
- Pladevall M, Riera-Guardia N, Margulis AV, Varas-Lorenzo C, Calingaert B, Perez-Gutthann S. Cardiovascular risk associated with the use of glitazones, metformin and sulfonylureas: meta-analysis of published observational studies. *BMC Cardiovasc Disord* 2016;16:14
- Garratt KN, Brady PA, Hassinger NL, Grill DE, Terzic A, Holmes DR Jr. Sulfonylurea drugs

increase early mortality in patients with diabetes mellitus after direct angioplasty for acute myocardial infarction. *J Am Coll Cardiol* 1999;33:119–124

- Olsson J, Lindberg G, Gottsäter M, et al. Increased mortality in type II diabetic patients using sulphonylurea and metformin in combination: a population-based observational study. *Diabetologia* 2000;43:558–560
- Klamann A, Sarfert P, Launhardt V, Schulte G, Schmiegel WH, Nauck MA. Myocardial infarction in diabetic vs non-diabetic subjects. Survival and infarct size following therapy with sulfonylureas (glibenclamide). *Eur Heart J* 2000;21:220–229
- Gulliford M, Latinovic R. Mortality in type 2 diabetic subjects prescribed metformin and sulphonylurea drugs in combination: cohort study. *Diabetes Metab Res Rev* 2004;20:239–245
- Mannucci E, Monami M, Masotti G, Marchionni N. All-cause mortality in diabetic patients treated with combinations of sulfonylureas and biguanides. *Diabetes Metab Res Rev* 2004;20:44–47
- Koro CE, Bowlin SJ, Weiss SR. Antidiabetic therapy and the risk of heart failure in type 2 diabetic patients: an independent effect or confounding by indication. *Pharmacoepidemiol Drug Saf* 2005;14:697–703
- Johnson JA, Simpson SH, Toth EL, Majumdar SR. Reduced cardiovascular morbidity and mortality associated with metformin use in subjects with type 2 diabetes. *Diabet Med* 2005;22:497–502
- Danchin N, Charpentier G, Ledru F, et al. Role of previous treatment with sulfonylureas in diabetic patients with acute myocardial infarction: results from a nationwide French registry. *Diabetes Metab Res Rev* 2005;21:143–149
- Eurich DT, Majumdar SR, McAlister FA, Tsuyuki RT, Johnson JA. Improved clinical outcomes associated with metformin in patients with diabetes and heart failure. *Diabetes Care* 2005;28:2345–2351
- Evans JM, Ogston SA, Emslie-Smith A, Morris AD. Risk of mortality and adverse cardiovascular outcomes in type 2 diabetes: a comparison of patients treated with sulfonylureas and metformin. *Diabetologia* 2006;49:930–936
- Johnsen SP, Monster TB, Olsen ML, et al. Risk and short-term prognosis of myocardial infarction among users of antidiabetic drugs. *Am J Ther* 2006;13:134–140
- Simpson SH, Majumdar SR, Tsuyuki RT, Eurich DT, Johnson JA. Dose-response relation between sulfonylurea drugs and mortality in type 2 diabetes mellitus: a population-based cohort study. *CMAJ* 2006;174:169–174
- Kahler KH, Rajan M, Rhoads GG, et al. Impact of oral antihyperglycemic therapy on all-cause mortality among patients with diabetes in the Veterans Health Administration. *Diabetes Care* 2007;30:1689–1693
- McAfee AT, Koro C, Landon J, Ziyadeh N, Walker AM. Coronary heart disease outcomes in patients receiving antidiabetic agents. *Pharmacoepidemiol Drug Saf* 2007;16:711–725
- McAlister FA, Eurich DT, Majumdar SR, Johnson JA. The risk of heart failure in patients with type 2 diabetes treated with oral agent monotherapy. *Eur J Heart Fail* 2008;10:703–708
- Horsdal HT, Johnsen SP, Søndergaard F, Rungby J. Type of preadmission glucose-

- lowering treatment and prognosis among patients hospitalised with myocardial infarction: a nationwide follow-up study. *Diabetologia* 2008;51:567–574
24. Sadikot SM, Mogensen CE. Risk of coronary artery disease associated with initial sulphonylurea treatment of patients with type 2 diabetes: a matched case-control study. *Diabetes Res Clin Pract* 2008;82:391–395
25. Tzoulaki I, Molokhia M, Curcin V, et al. Risk of cardiovascular disease and all cause mortality among patients with type 2 diabetes prescribed oral antidiabetes drugs: retrospective cohort study using UK General Practice Research Database. *BMJ* 2009;339:b4731
26. Pantalone KM, Kattan MW, Yu C, et al. The risk of developing coronary artery disease or congestive heart failure, and overall mortality, in type 2 diabetic patients receiving rosiglitazone, pioglitazone, metformin, or sulfonylureas: a retrospective analysis. *Acta Diabetol* 2009;46:145–154
27. Horsdal HT, Johnsen SP, Søndergaard F, et al. Sulfonylureas and prognosis after myocardial infarction in patients with diabetes: a population-based follow-up study. *Diabetes Metab Res Rev* 2009;25:515–522
28. Khalangot M, Tronko M, Kravchenko V, Kovtun V. Glibenclamide-related excess in total and cardiovascular mortality risks: data from large Ukrainian observational cohort study. *Diabetes Res Clin Pract* 2009;86:247–253
29. Azoulay L, Schneider-Lindner V, Dell'aniello S, Schiffrin A, Suissa S. Combination therapy with sulfonylureas and metformin and the prevention of death in type 2 diabetes: a nested case-control study. *Pharmacoepidemiol Drug Saf* 2010;19:335–342
30. Andersson C, Olesen JB, Hansen PR, et al. Metformin treatment is associated with a low risk of mortality in diabetic patients with heart failure: a retrospective nationwide cohort study. *Diabetologia* 2010;53:2546–2553
31. Evans JM, Doney AS, AlZadjali MA, et al. Effect of metformin on mortality in patients with heart failure and type 2 diabetes mellitus. *Am J Cardiol* 2010;106:1006–1010
32. Jørgensen CH, Gislason GH, Andersson C, et al. Effects of oral glucose-lowering drugs on long term outcomes in patients with diabetes mellitus following myocardial infarction not treated with emergent percutaneous coronary intervention—a retrospective nationwide cohort study. *Cardiovasc Diabetol* 2010;9:54
33. MacDonald MR, Eurich DT, Majumdar SR, et al. Treatment of type 2 diabetes and outcomes in patients with heart failure: a nested case-control study from the U.K. General Practice Research Database. *Diabetes Care* 2010;33:1213–1218
34. Pantalone KM, Kattan MW, Yu C, et al. The risk of overall mortality in patients with type 2 diabetes receiving glipizide, glyburide, or glimepiride monotherapy: a retrospective analysis. *Diabetes Care* 2010;33:1224–1229
35. Zeller M, Danchin N, Simon D, et al.; French Registry of Acute ST-Elevation and Non-ST-Elevation Myocardial Infarction investigators. Impact of type of preadmission sulfonylureas on mortality and cardiovascular outcomes in diabetic patients with acute myocardial infarction. *J Clin Endocrinol Metab* 2010;95:4993–5002
36. Corrao G, Romio SA, Zamboni A, Merlino L, Bosi E, Scavini M. Multiple outcomes associated with the use of metformin and sulphonylureas in type 2 diabetes: a population-based cohort study in Italy. *Eur J Clin Pharmacol* 2011;67:289–299
37. Horsdal HT, Søndergaard F, Johnsen SP, Rungby J. Antidiabetic treatments and risk of hospitalisation with myocardial infarction: a nationwide case-control study. *Pharmacoepidemiol Drug Saf* 2011;20:331–337
38. Schramm TK, Gislason GH, Vaag A, et al. Mortality and cardiovascular risk associated with different insulin secretagogues compared with metformin in type 2 diabetes, with or without a previous myocardial infarction: a nationwide study. *Eur Heart J* 2011;32:1900–1908
39. Pantalone KM, Kattan MW, Yu C, et al. The risk of overall mortality in patients with type 2 diabetes receiving different combinations of sulfonylureas and metformin: a retrospective analysis. *Diabet Med* 2012;29:1029–1035
40. Jørgensen CH, Gislason GH, Bretler D, et al. Glyburide increases risk in patients with diabetes mellitus after emergent percutaneous intervention for myocardial infarction—a nationwide study. *Int J Cardiol* 2011;152:327–331
41. Andersson C, Gislason GH, Jørgensen CH, et al. Comparable long-term mortality risk associated with individual sulfonylureas in diabetes patients with heart failure. *Diabetes Res Clin Pract* 2011;94:119–125
42. Pantalone KM, Kattan MW, Yu C, et al. Increase in overall mortality risk in patients with type 2 diabetes receiving glipizide, glyburide or glimepiride monotherapy versus metformin: a retrospective analysis. *Diabetes Obes Metab* 2012;14:803–809
43. Roumie CL, Hung AM, Greevy RA, et al. Comparative effectiveness of sulfonylurea and metformin monotherapy on cardiovascular events in type 2 diabetes mellitus: a cohort study. *Ann Intern Med* 2012;157:601–610
44. Juurlink DN, Gomes T, Shah BR, Mamdani MM. Adverse cardiovascular events during treatment with glyburide (glibenclamide) or glipizide in a high-risk population. *Diabet Med* 2012;29:1524–1528
45. Currie CJ, Poole CD, Evans M, Peters JR, Morgan CL. Mortality and other important diabetes-related outcomes with insulin vs other antihyperglycemic therapies in type 2 diabetes. *J Clin Endocrinol Metab* 2013;98:668–677
46. Wheeler S, Moore K, Forsberg CW, et al. Mortality among veterans with type 2 diabetes initiating metformin, sulfonylurea or rosiglitazone monotherapy. *Diabetologia* 2013;56:1934–1943
47. Bo S, Castiglione A, Ghigo E, et al. Mortality outcomes of different sulphonylurea drugs: the results of a 14-year cohort study of type 2 diabetic patients. *Eur J Endocrinol* 2013;169:117–126
48. Ghotbi AA, Køber L, Finer N, et al. Association of hypoglycemic treatment regimens with cardiovascular outcomes in overweight and obese subjects with type 2 diabetes: a substudy of the SCOUT trial. *Diabetes Care* 2013;36:3746–3753
49. Nagendran J, Oudit GY, Bakal JA, Light PE, Dyck JR, McAlister FA. Are users of sulphonylureas at the time of an acute coronary syndrome at risk of poorer outcomes? *Diabetes Obes Metab* 2013;15:1022–1028
50. Bannister CA, Holden SE, Jenkins-Jones S, et al. Can people with type 2 diabetes live longer than those without? A comparison of mortality in people initiated with metformin or sulphonylurea monotherapy and matched, non-diabetic controls. *Diabetes Obes Metab* 2014;16:1165–1173
51. Claesen M, Gillard P, De Smet F, Callens M, De Moor B, Mathieu C. Mortality in individuals treated with glucose-lowering agents: a large, controlled cohort study. *J Clin Endocrinol Metab* 2016;101:461–469
52. Genuth S. Should sulfonylureas remain an acceptable first-line add-on to metformin therapy in patients with type 2 diabetes? No, it's time to move on! *Diabetes Care* 2015;38:170–175
53. Suissa S, Azoulay L. Metformin and the risk of cancer: time-related biases in observational studies. *Diabetes Care* 2012;35:2665–2673
54. Huang ES, Laiteerapong N, Liu JY, John PM, Moffet HH, Karter AJ. Rates of complications and mortality in older patients with diabetes mellitus: the diabetes and aging study. *JAMA Intern Med* 2014;174:251–258
55. Nissen SE, Wolski K. Effect of rosiglitazone on the risk of myocardial infarction and death from cardiovascular causes. *N Engl J Med* 2007;356:2457–2471
56. Suissa S. Immortal time bias in pharmacoepidemiology. *Am J Epidemiol* 2008;167:492–499
57. Cole SR, Hernán MA. Constructing inverse probability weights for marginal structural models. *Am J Epidemiol* 2008;168:656–664
58. Krentz AJ, Bailey CJ. Oral antidiabetic agents: current role in type 2 diabetes mellitus. *Drugs* 2005;65:385–411
59. Abdelmoneim AS, Hasenbank SE, Seubert JM, Brocks DR, Light PE, Simpson SH. Variations in tissue selectivity amongst insulin secretagogues: a systematic review. *Diabetes Obes Metab* 2012;14:130–138
60. Zinman B, Wanner C, Lachin JM, et al.; EMPA-REG OUTCOME Investigators. Empagliflozin, cardiovascular outcomes, and mortality in type 2 diabetes. *N Engl J Med* 2015;373:2117–2128
61. Marso SP, Daniels GH, Brown-Frandsen K, et al.; LEADER Steering Committee; LEADER Trial Investigators. Liraglutide and cardiovascular outcomes in type 2 diabetes. *N Engl J Med* 2016;375:311–322
62. Marso SP, Bain SC, Consoli A, et al.; SUSTAIN-6 Investigators. Semaglutide and cardiovascular outcomes in patients with type 2 diabetes. *N Engl J Med* 2016;375:1834–1844
63. Scirica BM, Bhatt DL, Braunwald E, et al.; SAVOR-TIMI 53 Steering Committee and Investigators. Saxagliptin and cardiovascular outcomes in patients with type 2 diabetes mellitus. *N Engl J Med* 2013;369:1317–1326
64. Yu OH, Filion KB, Azoulay L, Patenaude V, Majdan A, Suissa S. Incretin-based drugs and the risk of congestive heart failure. *Diabetes Care* 2015;38:277–284
65. Chen DY, Wang SH, Mao CT, et al. Sitagliptin and cardiovascular outcomes in diabetic patients with chronic kidney disease and acute myocardial infarction: a nationwide cohort study. *Int J Cardiol* 2015;181:200–206
66. Ou SM, Shih CJ, Chao PW, et al. Effects on clinical outcomes of adding dipeptidyl peptidase-4 inhibitors versus sulfonylureas to metformin therapy in patients with type 2 diabetes mellitus. *Ann Intern Med* 2015;163:663–672
67. Wang SH, Chen DY, Lin YS, et al. Cardiovascular outcomes of sitagliptin in type 2 diabetic patients with acute myocardial infarction, a



- population-based cohort study in Taiwan. *PLoS One* 2015;10:e0131122
68. Giorda CB, Picariello R, Tartaglino B, et al. Hospitalisation for heart failure and mortality associated with dipeptidyl peptidase 4 (DPP-4) inhibitor use in an unselected population of subjects with type 2 diabetes: a nested case-control study. *BMJ Open* 2015;5:e007959
69. Fu AZ, Johnston SS, Ghannam A, et al. Association between hospitalization for heart failure and dipeptidyl peptidase 4 inhibitors in patients with type 2 diabetes: an observational study. *Diabetes Care* 2016;39:726–734
70. Chang CH, Chang YC, Lin JW, et al. No increased risk of hospitalization for heart failure for patients treated with dipeptidyl peptidase-4 inhibitors in Taiwan. *Int J Cardiol* 2016;220:14–20
71. Toh S, Hampp C, Reichman ME, et al. Risk for hospitalized heart failure among new users of saxagliptin, sitagliptin, and other antihyperglycemic drugs: a retrospective cohort study. *Ann Intern Med* 2016;164:705–714
72. Filion KB, Azoulay L, Platt RW, et al.; CNO-DES Investigators. A multicenter observational study of incretin-based drugs and heart failure. *N Engl J Med* 2016;374:1145–1154
73. Weir DL, McAlister FA, Senthilselvan A, Minhas-Sandhu JK, Eurich DT. Sitagliptin use in patients with diabetes and heart failure: a population-based retrospective cohort study. *JACC Heart Fail* 2014;2:573–582
74. Wang KL, Liu CJ, Chao TF, et al. Sitagliptin and the risk of hospitalization for heart failure: a population-based study. *Int J Cardiol* 2014;177:86–90
